# Supplementary material
Source: Research Square preprint supplement (doi:10.21203/rs.3.rs-9188152/v1)
Supplement: Supplementary file 1 [file 45727aa78d8f2fb0e5d99cc9.docx]

**Appendix A.**

**Study-Developed Professional Characteristics Questionnaire (English Translation)**

***Note.*** *The questionnaire was administered in Hebrew via Google Forms. The text below provides an English translation of the study-developed items used to assess participants’ demographic and professional characteristics. Standardized scale items from FIT-Choice, OSTES, and TOE-SES are not reproduced here.*

**Participant information and consent**

Participants were presented with the following information before beginning the survey:

You are invited to take part in a research study examining teachers’ professional practices, motivations, and beliefs about teaching. Participation is voluntary. The questionnaire is anonymous, and responses are reported only in aggregated form. Participants may stop completing the questionnaire at any time without penalty. By proceeding with the questionnaire, participants indicate that they have read the information provided and agree to participate.

Consent options:

- Yes, I consent to participate.
- No, I do not consent.

**Study-developed questionnaire items.**

**1. Are you currently a teacher?**
Mark one option.

- Elementary school teacher
- Middle school teacher
- High school teacher
- Retired teacher
- Previously a teacher, not currently teaching.
- Not a teacher
- Other: _________

**2. In which country do you currently live?**
______________

*Note. This item was included as part of a broader research instrument designed for use across multiple national contexts. The present analysis is based on responses from Israeli participants only.*

**3. What is your gender?**
Mark one option.

- Male
- Female
- Prefer not to say.
- Other: _________

**4. What is your age?**
Mark one option.

- 18-25
- 26-35
- 36-45
- 46-60
- Over 60

**5. What is your main professional setting?**
Mark one option

- Teaching in a school
- Teaching in an informal/non-formal setting
- Teaching teachers (teacher education / teacher training)
- Not teaching at the moment
- Non-profit organization that works with schools
- Other: _________

**6. How many years of teaching experience do you have?**
Mark one option.

- 0-5
- 6-10
- 11-15
- Over 15

**7. What is the highest academic degree you have completed?**
Mark one option.

- Doctorate
- Master’s degree
- Bachelor’s degree
- No academic degree

**8. Do you hold any professional teaching credentials or certifications?**
Mark one option.

- Yes
- No

**9. Do you consider yourself an outdoor teacher?**

Mark one option.

- I consider myself an outdoor teacher.
- I do not consider myself an outdoor teacher.
- Other: _________

**10. Are you currently volunteering in any community organizations?**
Mark one option.

- Yes
- No
- Other: _________

**11. Do you participate or volunteer in informal/non-formal education activities outside your teaching job?**
Mark one option.

- Yes
- No
- Other: _________

**12. Which types of informal/non-formal education do you participate in or volunteer in?**
Select all that apply.

- Youth movements
- Environmental education
- After-school educational programs
- Community education initiatives
- Outdoor education programs
- Other: _________

**13. As a child, did you regularly participate in outdoor activities such as hiking, field trips, camping, or nature-based experiences?**
Mark one option.

- Yes
- No
- Not sure

**14. How often do you currently spend time in nature?**
Mark one option.

- Rarely or never
- A few times a year
- About once a month
- About once a week
- Daily or almost daily

**15. How important is it to you to incorporate nature into teaching and learning?**
Rate on a 5-point scale.

1 = Not at all important
2 = Slightly important
3 = Moderately important
4 = Important
5 = Very important

**16. How often do you use outdoor teaching methods as part of your work with students?**
Mark one option.

- Never
- Rarely
- Sometimes
- Often
- Very often

**17. How comfortable do you feel teaching outdoors?**
Rate on a 5-point scale.

1 = Not at all comfortable
2 = Slightly comfortable
3 = Moderately comfortable
4 = Comfortable
5 = Very comfortable

**18. To what extent is outdoor education central to your teaching philosophy and professional practice?**
Rate on a 5-point scale.

1 = Not at all central
2 = Slightly central
3 = Moderately central
4 = Central
5 = Very central
